# Supplementary material for: A Nomogram Based on Preoperative Lab Tests, BMI, ICG-R15, and EHBF for the Prediction of Post-Hepatectomy Liver Failure in Patients with Hepatocellular Carcinoma
Source: MDPI journal article supplement (doi:10.3390/jcm12010324), 2022-12-31
Supplement: s1 [file s1]

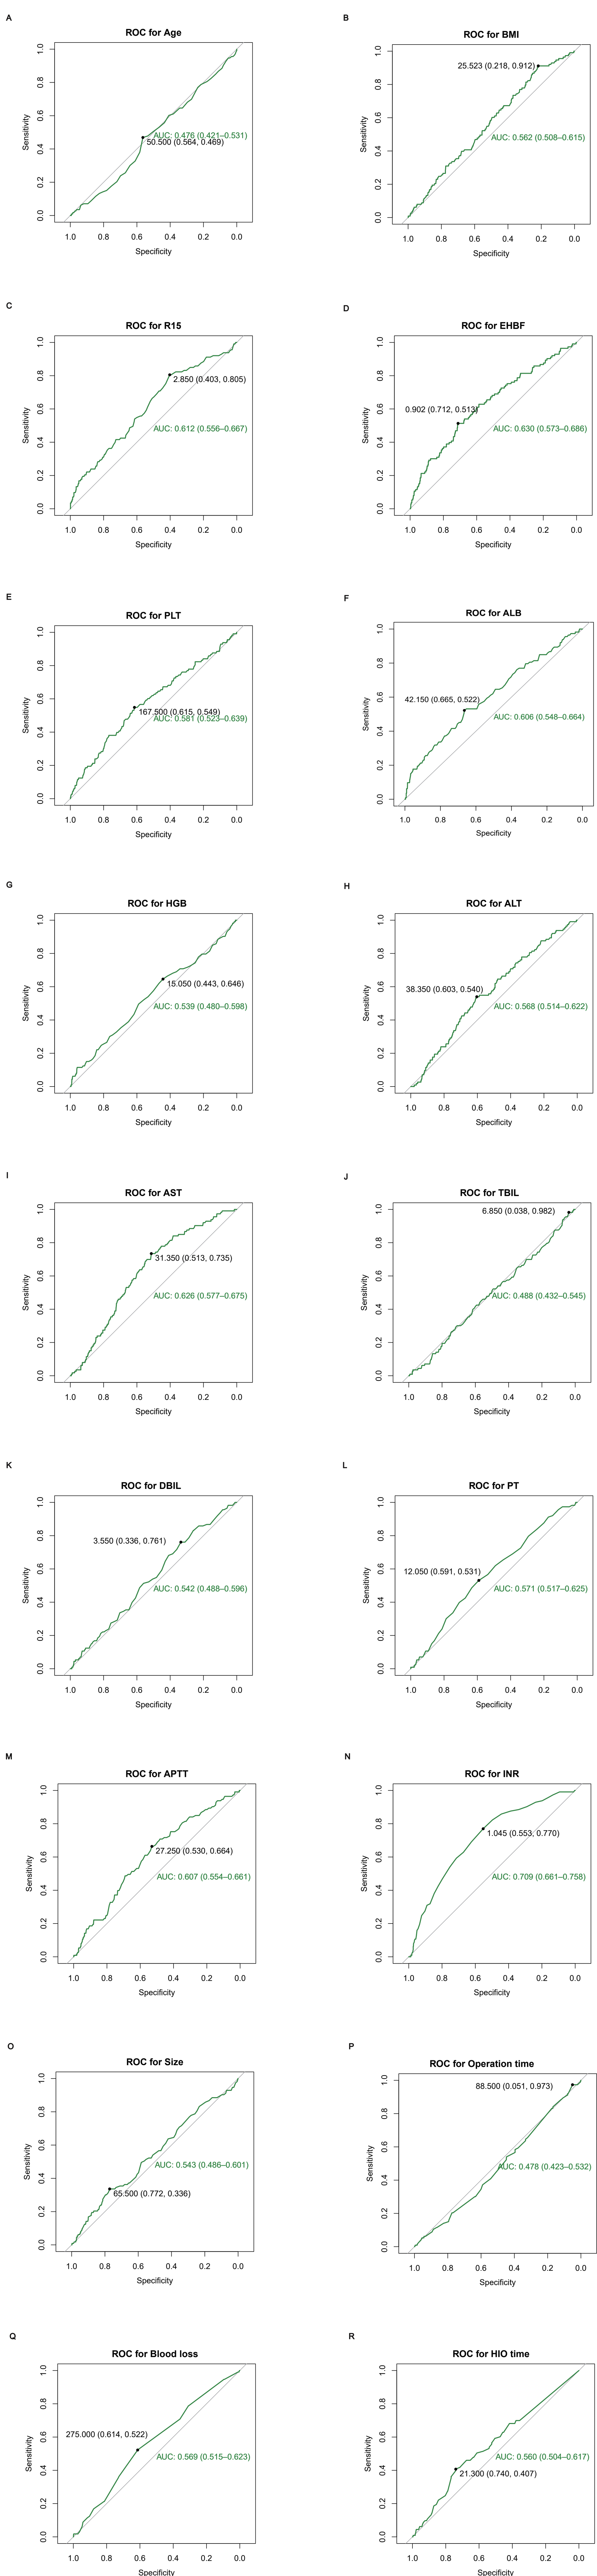

Supplement Figure S1: Cut-off identification by ROC curve of (A) Age, (B) BMI, (C) ICG-R15, (D) EHBf, (E) PLT, (F) ALB, (G) HGB, (H) ALT, (I) AST, (J) TBIL, (K) DBIL, (L) PT, (M) APTT, (N) INR, (O) Tumor size, (P) Operation time, (Q) Intraoperative blood loss, (R) HIO time.
